# Supplementary material for: Metaraminol and Noradrenaline in Septic Shock: A Retrospective Comparison
Source: Research Square preprint supplement (doi:10.21203/rs.3.rs-934176/v1), 2021-09-30
Supplement: Supplementary file 1 [file 585d8c98d00cfe563985f5a1.docx]

# Appendix

| Appendix 1. ANZICS Diagnosis Codes |
| --- |
| 109.06 - Cardiovascular - Endocarditis |
| 1102.01 - Musculoskeletal/Skin disease - Cellulitis and localized soft tissue infections |
| 1301.01 - Respiratory - Infection/abscess, other surgery for |
| 1301.02 - Respiratory - Thoracotomy for thoracic/ respiratory infection |
| 1406.01 - Gastrointestinal - Cholecystectomy/ cholangitis, surgery for (gallbladder removal) |
| 1408.03 - Gastrointestinal - Complications of previous GI surgery; surgery for anastomotic leak, bleeding, abscess, infection etc |
| 1409.02 - Gastrointestinal - GI abscess/cyst-primary, surgery for (for complications of GI surgery, see 1408.13) |
| 1904.01 - Musculoskeletal - Cellulitis and localized soft tissue infections, surgery for |
| 201.01 - Respiratory - Pneumonia, aspiration, toxic, chemical pneumonitis |
| 212.01 - Respiratory - Pneumonia, bacterial |
| 213.01 - Respiratory - Pneumonia, viral |
| 313.01 - Gastrointestinal - Cholangitis |
| 313.05 - Gastrointestinal - Peritonitis |
| 501.01 - Sepsis - Sepsis, cutaneous/ soft tissue |
| 501.02 - Sepsis - Sepsis, GI |
| 501.03 - Sepsis - Sepsis, gynaecologic |
| 501.04 - Sepsis - Sepsis, other |
| 501.05 - Sepsis - Sepsis, pulmonary |
| 501.06 - Sepsis - Sepsis, unknown |
| 502.01 - Sepsis - Sepsis, renal/ UTI (including bladder) |
| 503.01 - Sepsis - Sepsis with shock, not urinary tract |
| 504.01 - Sepsis - Sepsis with shock, urinary tract |
